# Supplementary material
Source: Springer Nature journal article supplement (https://www.springermedizin.de/resource/supplementary/12963_2010_133_MOESM5_ESM.pdf/9572732)
Supplement: MOESM5 [file 9572732]

Percent change

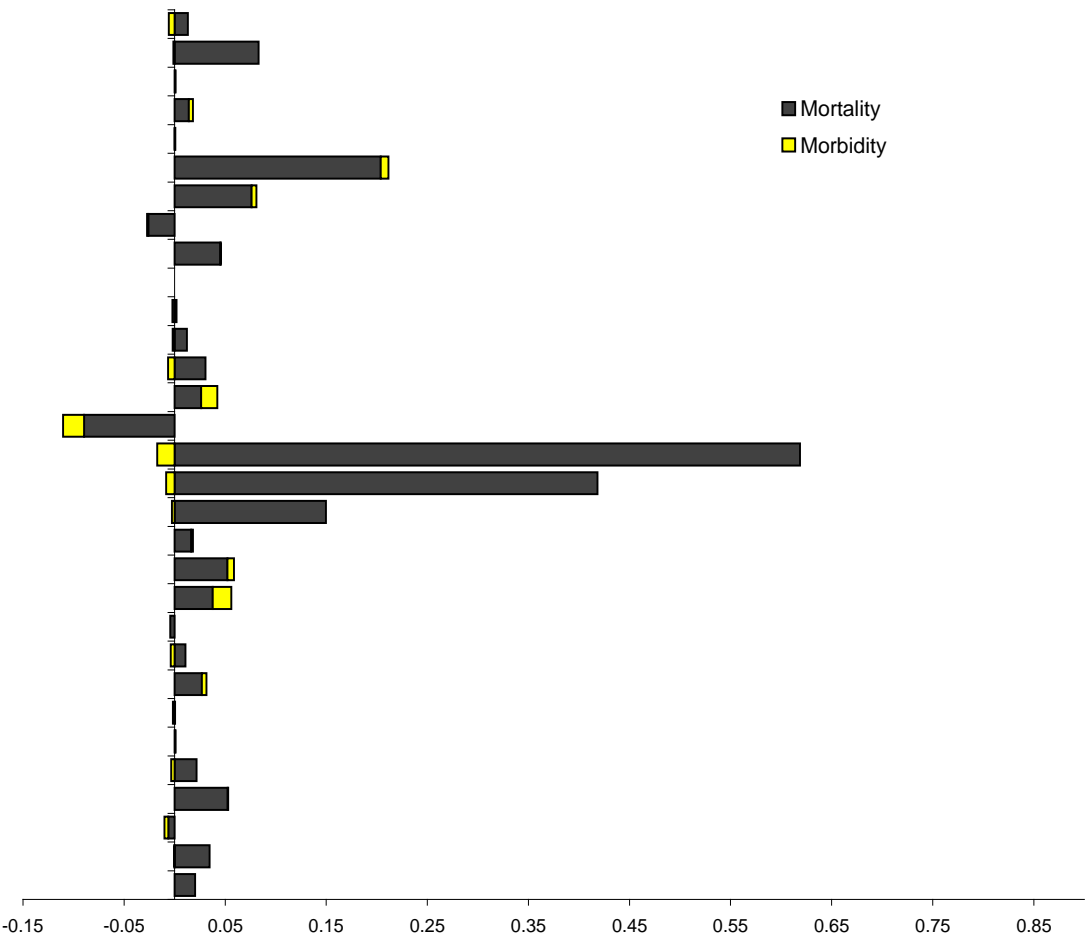

|                                              | Mortality  | Morbidity  | Total      |
|----------------------------------------------|------------|------------|------------|
| Infectious                                   | 1.2        | -297.0     | 0.7        |
| Acute respiratory                            | 7.5        | -59.3      | 7.4        |
| Maternal                                     | 0.0        | 22.7       | 0.1        |
| Neonatal                                     | 1.3        | 212.8      | 1.6        |
| Nutritional                                  | 0.0        | 25.9       | 0.1        |
| Cancer                                       | 18.5       | 381.6      | 19.1       |
| <i>Colorectal cancer</i>                     | 6.9        | 241.7      | 7.3        |
| <i>Lung cancer</i>                           | -2.4       | -66.3      | -2.5       |
| <i>Breast cancer</i>                         | 4.1        | 11.1       | 4.1        |
| <i>Prostate cancer</i>                       | <i>n.a</i> | <i>n.a</i> | <i>n.a</i> |
| Other neoplasms                              | -0.2       | 98.2       | 0.0        |
| Diabetes                                     | 1.1        | -103.9     | 0.9        |
| Endocrine                                    | 2.8        | -323.8     | 2.2        |
| Mental                                       | 2.4        | 816.3      | 3.8        |
| Neurological                                 | -8.1       | -1050.9    | -10.0      |
| Cardiovascular                               | 56.0       | -873.3     | 54.3       |
| <i>Coronary heart disease</i>                | 37.9       | -423.1     | 37.1       |
| <i>Stroke</i>                                | 13.6       | -134.7     | 13.3       |
| Chronic respiratory                          | 1.5        | 80.3       | 1.6        |
| Digestive                                    | 4.7        | 336.3      | 5.3        |
| Genitourinary                                | 3.4        | 926.9      | 5.1        |
| Skin                                         | -0.4       | -1.6       | -0.4       |
| Musculoskeletal                              | 1.0        | -191.7     | 0.6        |
| Congenital                                   | 2.4        | 231.0      | 2.9        |
| Oral                                         | -0.2       | 22.2       | -0.1       |
| Ill defined syndromes                        | 0.0        | 26.1       | 0.1        |
| Unintentional injuries                       | 2.0        | -166.5     | 1.7        |
| <i>Road traffic accidents</i>                | 4.8        | 21.1       | 4.8        |
| <i>Falls</i>                                 | -0.6       | -190.7     | -0.9       |
| Intentional injuries                         | 3.1        | -12.3      | 3.1        |
| <i>Suicide &amp; self-inflicted injuries</i> | 1.8        | -2.4       | 1.8        |

Contribution (years)

100.0 100.0 100.0
